# Supplementary material for: Effect of ionic strength on rheological behavior of polymer-like cetyltrimethylammonium tosylate micellar solutions
Source: Royal Society of Chemistry journal article supplement (doi:10.1039/c0sm00739k), 2010-12-22
Supplement: c0sm00739k.pdf [file c0sm00739k.pdf]

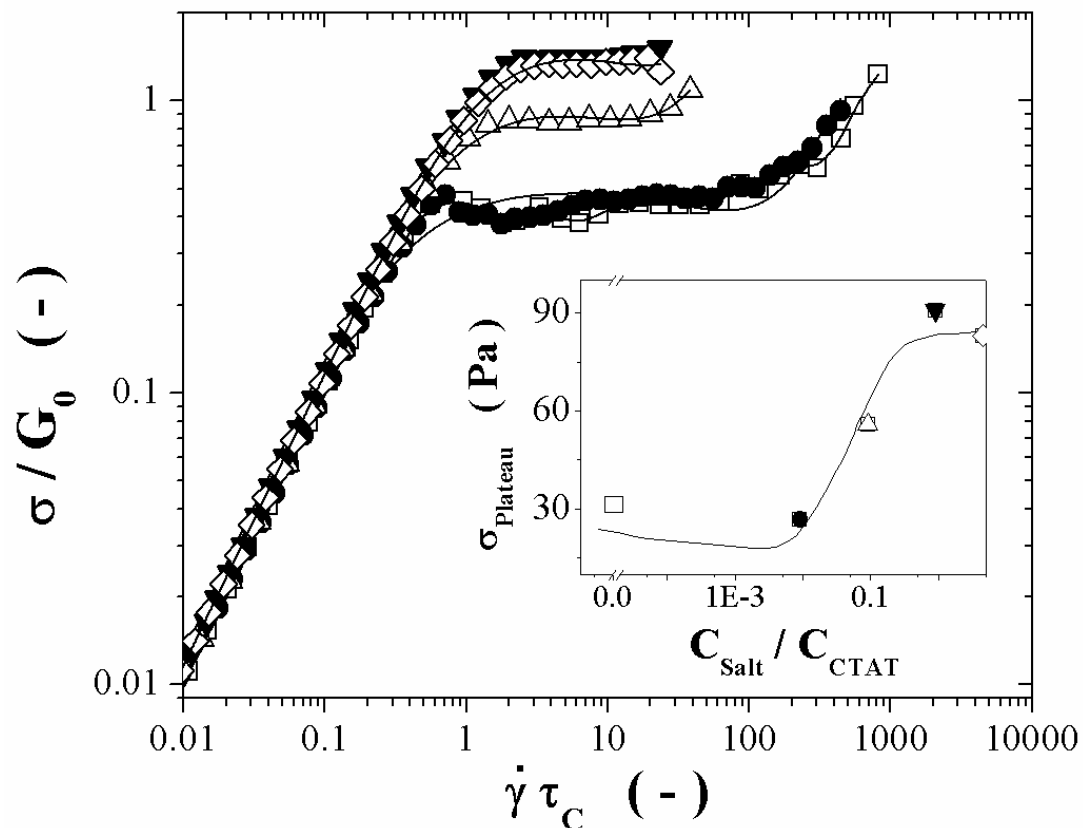

**Fig. S1** Reduced shear stress versus reduced shear rate for 0.11 M solutions containing KBr as function of  $C_{\text{SALT}}/C_{\text{CTAT}}$ : ( $\square$ ) 0, ( $\bullet$ ) 0.01, ( $\triangle$ ) 0.1, ( $\blacktriangledown$ ) 1 and ( $\diamond$ ) 5. Inset: Shear stress plateau as a function of  $C_{\text{SALT}}/C_{\text{CTAT}}$ . Solid lines represent the best fit of the BMP Model.

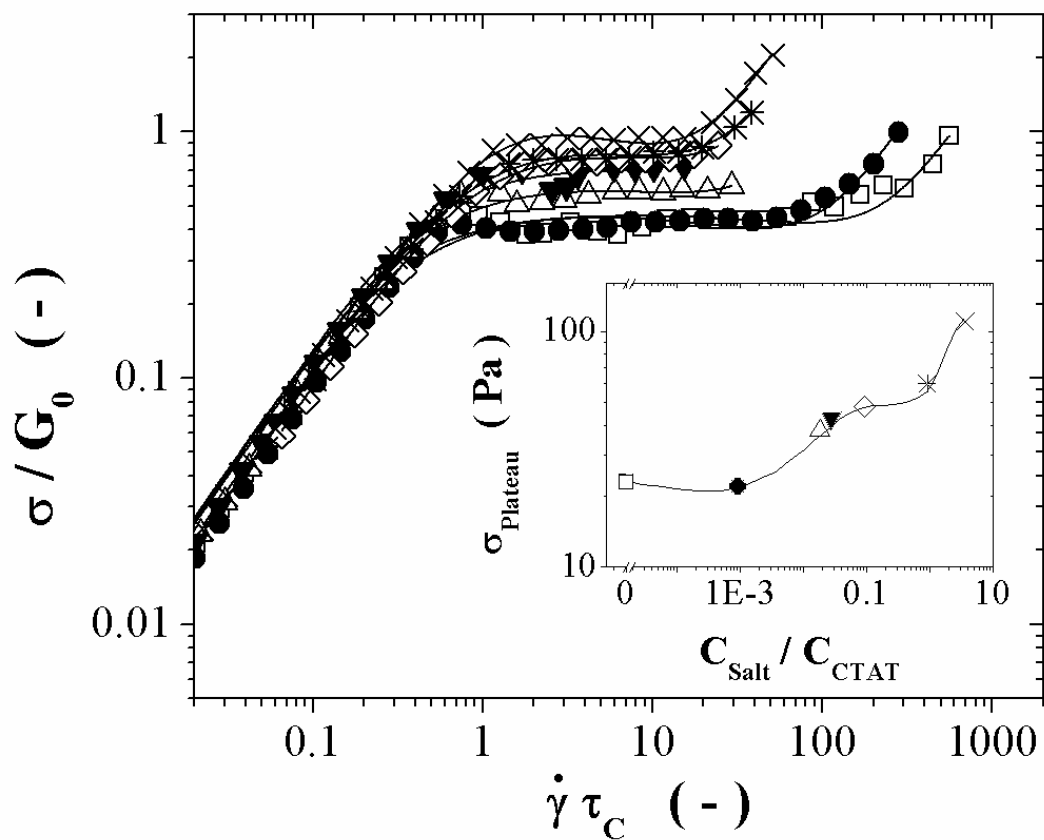

**Fig. S2** Reduced shear stress versus reduced shear rate for 0.11 M solutions containing  $\text{K}_2\text{SO}_4$  as function of  $C_{\text{SALT}}/C_{\text{CTAT}}$ : ( $\square$ ) 0, ( $\bullet$ ) 0.001, ( $\triangle$ ) 0.01, ( $\blacktriangledown$ ) 0.05, ( $\diamond$ ) 0.1, ( $*$ ) 1 and ( $\times$ ) 5. Inset: Shear stress plateau as a function of  $C_{\text{SALT}}/C_{\text{CTAT}}$ . Solid lines represent the best fit of the BMP Model.
